# Supplementary material for: Abiotic versus biotic controls on soil nitrogen cycling in drylands along a 3200 km transect
Source: Copernicus journal article supplement (doi:10.5194/bg-2016-226), 2016-06-10
Supplement: Supplementary file 1 [file bg-2016-226-supplement.pdf]

1 **Abiotic versus biotic controls on soil nitrogen cycling in**  
2 **drylands along a 3200 km transect**

3 Dongwei Liu<sup>1\*</sup>, Weixing Zhu<sup>1, 2</sup>, Xiaobo Wang<sup>1\*</sup>, Yuepeng Pan<sup>3</sup>, Chao Wang<sup>1</sup>, Dan  
4 Xi<sup>1, 5</sup>, Edith Bai<sup>1</sup>, Yuesi Wang<sup>3</sup>, Xingguo Han<sup>1</sup>, Yunting Fang<sup>1, 4</sup>

5  
6 <sup>1</sup> Key Laboratory of Forest Ecology and Management, Institute of Applied Ecology, Chinese  
7 Academy of Sciences, Shenyang, 110016, China

8 <sup>2</sup> Department of Biological Sciences, Binghamton University, State University of New York,  
9 Binghamton, NY 13902

10 <sup>3</sup> State Key Laboratory of Atmospheric Boundary Layer Physics and Atmospheric Chemistry  
11 (LAPC), Institute of Atmospheric Physics, Chinese Academy of Sciences, Beijing, 100029, China

12 <sup>4</sup> Qingyuan Forest CERN, Chinese Academy of Sciences, Shenyang 110016, China

13 <sup>5</sup> College of Resources and Environment, University of Chinese Academy of Sciences, Beijing,  
14 100049, China

15

16 \*These authors contributed equally to this work.

17

18 **Corresponding Author:**

19 Weixing Zhu

20 Department of Biological Sciences, Binghamton University – State University of New York,  
21 Binghamton, NY 13902-6000

22 Phone: (607) 777-3218

23 Fax: (607)-777-6521

24 Email: wxzhu@binghamton.edu

25

26 Yunting Fang

27 Institute of Applied Ecology, the Chinese Academy of Science, No.72, Wenhua Road, Shenyang, P.  
28 R. China, 110016

29 Phone: +86-24-83970541

30 Fax: +86-24-83970300

31 Email: fangyt@iae.ac.cn

32

33 **Supplementary Information**

34

35 **Supplementary Figure legends:**

36

37 **Figure S1** Climate variables. The positive correlation (b) between aridity index (AI) and precipitation  
38 demonstrated that the precipitation gradient here can also be considered as an AI gradient. In each site,  
39 n=1.

40

41 **Figure S2** Soil moisture along the precipitation gradient. Soil moisture was expressed as a percent of dry  
42 soil on a mass basis. In each site, n=5.

43

44

45

46

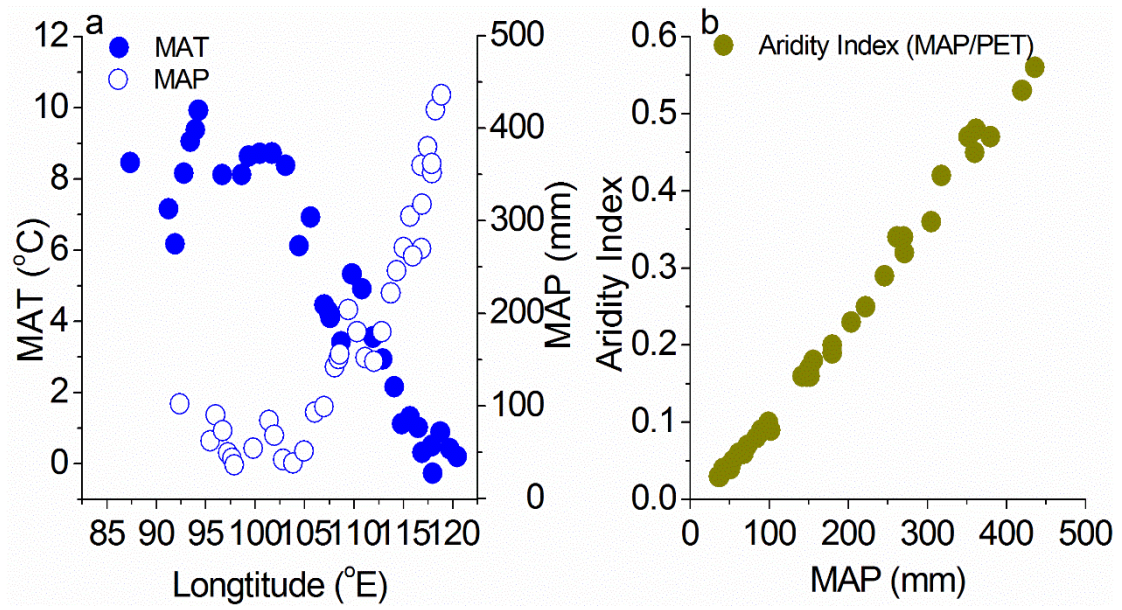

47

48 **Figure S1**

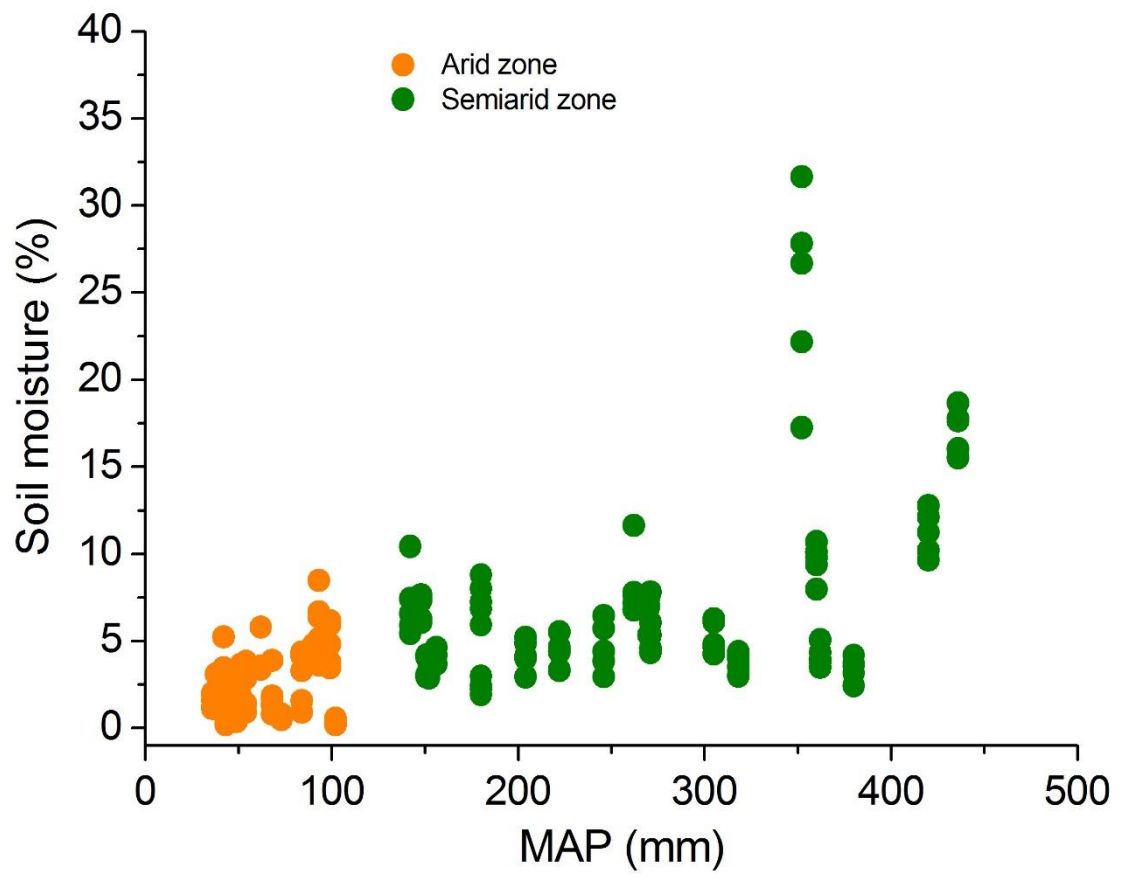

49

50 **Figure S2**
